# Supplementary material for: Study on Enhancement Principle and Stabilization for the Luminol-H2O2-HRP Chemiluminescence System
Source: PLoS One. 2015 Jul 8;10(7):e0131193. doi: 10.1371/journal.pone.0131193 (PMC4495922; doi:10.1371/journal.pone.0131193)
Supplement: S7 Text — (XLS) [file pone.0131193.s007.xls]

## Sheet: Sheet1
		0.125mmol/L	0.25mmol/L	0.5mmol/L	1mmol/L	2mmol/L	4mmol/L	8mmol/L
	1	257000000	779000000	1510000000	2110000000	2070000000	1840000000	1650000000
	2	188265000	574483000	1274610000	1827510000	2162610000	2400780000	2091080000
	3	147319000	404421000	1065320000	1748160000	2127270000	2105520000	2103970000
	4	117616000	288115000	874004000	1590870000	1835070000	2020930000	2025350000
	5	94310300	220372000	714808000	1449420000	1754110000	2009360000	1878660000
	6	73743100	174920000	573379000	1297360000	1668050000	1849660000	1633480000
	7	58837200	145997000	455650000	1166050000	1513050000	1783950000	1411960000
	8	47182100	123209000	365274000	1045430000	1390690000	1705630000	1233680000
	9	36974300	105461000	299375000	938750000	1271290000	1541120000	1064330000
	10	28711000	90167400	250342000	834765000	1151450000	1425760000	909888000
	11	22219600	78050900	219364000	752041000	1057160000	1316560000	789190000
	12	16742600	66642600	191363000	649535000	940824000	1174680000	647601000
	13	11849100	56498300	167954000	577652000	847112000	1068350000	543027000
	14	9232000	49707000	153957000	521074000	779387000	985976000	470122000
	15	6850780	43285300	141152000	449080000	698201000	887155000	384798000
	16	5011010	37597300	128928000	403781000	643011000	813005000	331380000
	17	3483630	32286500	118420000	355892000	574610000	729658000	283803000
	18	2547640	28237700	110351000	291860000	471078000	612832000	236095000
	19	1736480	23016200	95785100	261387000	412108000	541464000	211250000
	20	1170140	21164000	95496000	267002000	418016000	539480000	202921000
	21	786456	18424200	89460100	246236000	377862000	482315000	185845000
	22	541741	16111600	84154800	229974000	344960000	433066000	172087000
	23	368501	14116800	79753900	217741000	321397000	397032000	161729000
	24	240149	12205500	74971500	204238000	296307000	359738000	150653000
	25	160793	10533700	70263900	190980000	271973000	324182000	139970000
	26	106597	9307750	66425000	180779000	254132000	296464000	131548000
	27	80909.5	9170680	62880900	171947000	239384000	274460000	124175000
	28	42870.6	6985880	59430500	160736000	220981000	249872000	115921000
	29	28159.6	6035460	56342800	156129000	212516000	237611000	111527000
	30	17507.8	5196200	54212000	147192000	198234000	219186000	104543000
	31	10843.3	4433880	51542500	143120000	191981000	209998000	100699000
	32	7726.69	3798230	48910500	136952000	182739000	197707000	95631300
	33	4382.86	3199580	46514600	131301000	174648000	186977000	91007900
	34	2688.33	2648130	44184700	124159000	164315000	174270000	85487300
	35	1664.12	2166420	41738600	120463000	158843000	166976000	81919200
	36	1150.06	1805170	39792800	116181000	152643000	159405000	78311500
	37	948.04	1486870	37863600	111841000	146478000	151847000	74643600
	38	702.022	1320900	36239800	108128000	141322000	145592000	71630500
	39	662.02	1022750	34709500	104635000	136464000	139855000	68768500
	40	606.017	869364	33100000	101000000	132000000	134000000	65900000
	41	498.011	698294	31572600	97464700	126665000	128307000	63010400
	42	514.012	569174	30321500	94550500	122986000	123738000	60669800
	43	572.015	458159	28930900	91306100	118933000	119050000	58178400
	44	464.01	377609	27739700	88508300	115327000	114903000	56667500
	45	536.013	301333	26533600	85635100	110320000	109347000	53845000
